# Supplementary material
Source: PubMed Central journal article supplement (PMC11185159)

**Supplemental Table 1. Extra Data**

|                                                | <b>Total<br/>N = 626</b> | <b>RELAH<br/>n = 444</b> | <b>EILAH<br/>n = 182</b> | <b>P-value</b> |
|------------------------------------------------|--------------------------|--------------------------|--------------------------|----------------|
| Total comorbidities                            |                          | 4 (3-5)                  | 3 (2-4)                  | <0.001         |
| Composite coronary artery disease              | 217 (35%)                | 150 (33.8%)              | 67 (38%)                 | 0.47           |
| # of HF hospitalizations in the past 12 months | 1.0 (0.0,1.0)            | 1.0 (0.0,1.0)            | 1.0 (0.0,1.0)            | 0.80           |
| Thiazides only                                 | 27 (4.3%)                | 21 (4.7%)                | 6 (3.3%)                 | 0.42           |
| Loop diuretic agents and thiazides             | 36 (5.8%)                | 27 (6.1%)                | 9 (4.9%)                 | 0.58           |
| Sacubitril-valsartan                           | 0 (0.0%)                 | 0 (0.0%)                 | 0 (0.0%)                 |                |
| SGLT2 inhibitors                               | 16 (2.6%)                | 14 (3.2%)                | 2 (1.1%)                 | 0.14           |
| Digoxin                                        | 0 (0.0%)                 | 0 (0.0%)                 | 0 (0.0%)                 |                |
| Oral anticoagulants                            | 309 (49.4%)              | 236 (53.2%)              | 73 (40.1%)               | 0.003          |
| Anti-platelet therapy other than aspirin       | 71 (11.3%)               | 45 (10.1%)               | 26 (14.3%)               | 0.14           |

Total morbidities calculated as composite number of the following: any history of HTN, AF (or atrial flutter), CKD, COPD, obesity, DM, composite CAD (as defined below), and anemia.

Composite coronary artery disease includes a history of ischemic heart disease, PCI, CABG, prior MI, and clinically significant unvascularized CAD.

**Supplemental Table 2. Complete Echocardiographic Data**

|                                                                | <b>Total<br/>N = 626</b> | <b>RELAH<br/>n = 444</b> | <b>EILAH<br/>n = 182</b> | <b>P-value</b> |
|----------------------------------------------------------------|--------------------------|--------------------------|--------------------------|----------------|
| Heart rate at time of echocardiography (beats/min)             | 66.0 (60.0-74.0)         | 66.0 (59.0-75.0)         | 66.0 (60.0-73.0)         | 0.67           |
| Septal wall thickness (cm)                                     | 1.0 (0.9-1.1)            | 1.0 (0.9-1.1)            | 1.0 (0.9-1.1)            | 0.39           |
| Posterior wall thickness (cm)                                  | 0.9 (0.8-1.0)            | 0.9 (0.9-1.0)            | 0.9 (0.8-1.0)            | 0.017          |
| LV end-diastolic dimension (cm)                                | 4.8 (4.4-5.2)            | 4.9 (4.5-5.3)            | 4.7 (4.3-5.0)            | 0.002          |
| LV end-systolic dimension (cm)                                 | 3.5 (3.1-4.0)            | 3.5 (3.2-4.0)            | 3.4 (3.0-3.8)            | 0.015          |
| LV mass (g)                                                    | 162.0 (133.0-201.0)      | 164.0 (136.0-213.0)      | 153.0 (127.0-186.0)      | 0.002          |
| LV mass indexed to BSA (g/m <sup>2</sup> )                     | 80.8 (65.3-98.4)         | 82.7 (67.2-101.6)        | 77.4 (63.6-93.0)         | 0.005          |
| LV mass indexed to height <sup>2.7</sup> (g/m <sup>2.7</sup> ) | 40.8 (33.5-49.3)         | 41.7 (34.3-51.0)         | 38.7 (31.9-46.2)         | 0.002          |
| Relative wall thickness                                        | 0.4 (0.3-0.4)            | 0.4 (0.3-0.4)            | 0.4 (0.3-0.4)            | 0.77           |
| LV end-diastolic volume (mL)                                   | 217.8 (171.1-287.4)      | 223.4 (170.3-298.2)      | 211.2 (173.4-264.2)      | 0.096          |
| LV end-systolic volume (mL)                                    | 101.6 (75.9-137.8)       | 102.1 (77.0-145.8)       | 97.5 (75.6-125.0)        | 0.089          |
| LV end-diastolic volume index (mL/m <sup>2</sup> )             | 108.0 (90.0-135.0)       | 109.5 (91.0-138.0)       | 106.0 (89.0-128.0)       | 0.15           |
| LV end-systolic volume index (mL/m <sup>2</sup> )              | 51.0 (40.0-66.0)         | 51.0 (40.0-68.0)         | 51.0 (39.0-59.0)         | 0.12           |
| LV ejection fraction—core lab (%)                              | 54.3 (50.0-57.3)         | 54.0 (50.0-57.1)         | 54.7 (51.1-57.5)         | 0.29           |
| Mitral E velocity (cm/s)                                       | 86.0 (69.0-108.0)        | 91.0 (72.0-114.0)        | 76.0 (62.0-93.0)         | <0.001         |
| Mitral A velocity (cm/s)                                       | 75.0 (55.0-94.0)         | 72.5 (53.0-93.0)         | 80.0 (60.0-95.0)         | 0.020          |
| E/A ratio                                                      | 1.1 (0.8-1.6)            | 1.2 (0.8-1.8)            | 0.9 (0.7-1.3)            | <0.001         |
| Septal s' velocity (cm/s)                                      | 6.0 (5.0-8.0)            | 6.0 (5.0-7.0)            | 7.0 (6.0-8.0)            | 0.019          |
| Lateral s' velocity (cm/s)                                     | 7.0 (6.0-9.0)            | 7.0 (6.0-8.0)            | 8.0 (6.0-9.0)            | 0.007          |
| Septal e' velocity (cm/s)                                      | 6.0 (5.0-7.0)            | 6.0 (5.0-7.0)            | 6.0 (5.0-7.0)            | 0.28           |
| Lateral e' velocity (cm/s)                                     | 8.0 (6.0-10.0)           | 8.0 (6.0-10.0)           | 8.0 (6.0-10.0)           | 0.48           |
| Septal a' velocity (cm/s)                                      | 7.0 (6.0-9.0)            | 7.0 (5.0-9.0)            | 8.0 (7.0-10.0)           | <0.001         |
| Lateral a' velocity (cm/s)                                     | 8.0 (6.0-10.0)           | 8.0 (5.0-10.0)           | 9.0 (7.0-11.0)           | <0.001         |
| Septal E/e' ratio                                              | 14.0 (10.7-19.3)         | 15.3 (11.3-20.5)         | 12.9 (9.8-15.8)          | <0.001         |
| Lateral E/e' ratio                                             | 10.5 (7.8-14.8)          | 11.2 (8.2-15.9)          | 9.5 (7.1-12.3)           | <0.001         |
| Average E/e' ratio                                             | 12.5 (9.6-17.1)          | 13.2 (10.0-17.8)         | 10.8 (8.8-14.0)          | <0.001         |
| LA maximal volume (mL)                                         | 64.1 (50.2-83.6)         | 67.2 (52.0-87.5)         | 57.1 (45.2-75.3)         | <0.001         |
| LA minimal volume (mL)                                         | 41.5 (29.9-56.4)         | 45.1 (31.4-62.0)         | 34.4 (26.4-46.2)         | <0.001         |
| LA maximal volume indexed to BSA (mL/m <sup>2</sup> )          | 31.6 (24.9-40.6)         | 33.0 (26.0-41.3)         | 28.4 (23.1-36.5)         | <0.001         |
| LA minimal volume indexed to BSA (mL/m <sup>2</sup> )          | 20.3 (14.5-28.1)         | 21.8 (15.7-30.4)         | 17.0 (13.1-22.7)         | <0.001         |

|                                                                           |                     |                     |                     |        |
|---------------------------------------------------------------------------|---------------------|---------------------|---------------------|--------|
| LA maximal volume indexed to height <sup>2.7</sup> (mL/m <sup>2.7</sup> ) | 16.0 (12.4-20.5)    | 16.6 (13.0-21.2)    | 14.0 (11.9-18.4)    | <0.001 |
| LA minimal volume indexed to height <sup>2.7</sup> (mL/m <sup>2.7</sup> ) | 10.2 (7.2-14.3)     | 10.8 (7.7-15.4)     | 8.7 (6.6-11.7)      | <0.001 |
| Ratio of LA to RA volume                                                  | 1.3 (1.0-1.6)       | 1.2 (1.0-1.5)       | 1.3 (1.1-1.6)       | 0.068  |
| LA emptying fraction (%)                                                  | 35.3 (25.4-43.8)    | 32.8 (22.5-42.9)    | 39.6 (31.4-46.1)    | <0.001 |
| RV end-diastolic dimension (cm)                                           | 3.7 (3.4-4.1)       | 3.8 (3.4-4.2)       | 3.7 (3.3-4.0)       | 0.094  |
| RV end-systolic dimension (cm)                                            | 2.9 (2.6-3.3)       | 2.9 (2.6-3.3)       | 2.9 (2.5-3.2)       | 0.22   |
| RV end-diastolic volume (mL)                                              | 43.0 (33.0-56.8)    | 44.0 (33.0-57.0)    | 41.6 (32.4-54.5)    | 0.18   |
| RV end-systolic volume (mL)                                               | 21.8 (16.0-29.0)    | 22.0 (16.0-30.0)    | 20.0 (15.4-28.0)    | 0.15   |
| RV ejection fraction (%)                                                  | 50.0 (45.6-54.1)    | 50.0 (45.2-54.2)    | 50.0 (46.4-54.0)    | 0.35   |
| RV wall thickness (cm)                                                    | 0.4 (0.4-0.5)       | 0.4 (0.4-0.5)       | 0.4 (0.3-0.5)       | 0.051  |
| RV s' velocity (cm/s)                                                     | 11.0 (10.0-14.0)    | 11.0 (10.0-14.0)    | 11.0 (10.0-14.0)    | 0.77   |
| RV e' velocity (cm/s)                                                     | 9.0 (7.0-12.0)      | 10.0 (8.0-12.0)     | 9.0 (7.0-11.0)      | 0.091  |
| RV a' velocity (cm/s)                                                     | 12.0 (9.0-15.0)     | 11.0 (8.0-14.0)     | 12.0 (10.0-15.0)    | 0.091  |
| TAPSE (cm)                                                                | 2.0 (1.8-2.3)       | 2.0 (1.7-2.3)       | 2.0 (1.8-2.3)       | 0.17   |
| RA volume (mL)                                                            | 51.1 (38.6-68.4)    | 54.2 (42.4-73.5)    | 43.0 (34.1-58.4)    | <0.001 |
| RA volume indexed to BSA (mL/m <sup>2</sup> )                             | 25.2 (19.0-33.1)    | 26.8 (20.4-35.6)    | 22.4 (17.3-28.6)    | <0.001 |
| RA volume indexed to height <sup>2.7</sup> (mL/m <sup>2.7</sup> )         | 12.9 (9.7-16.4)     | 13.9 (10.2-17.4)    | 11.2 (8.8-13.6)     | <0.001 |
| Peak TR velocity (cm/s)                                                   | 261.0 (236.0-292.0) | 265.5 (240.0-300.0) | 250.0 (227.0-275.0) | <0.001 |
| Estimated PA systolic pressure (mm Hg)                                    | 31.0 (26.0-39.0)    | 33.0 (27.0-40.0)    | 28.0 (24.0-33.0)    | <0.001 |
| Estimated RA pressure (mm Hg)                                             | 3.0 (3.0-3.0)       | 3.0 (3.0-3.0)       | 3.0 (3.0-3.0)       | 0.15   |
| Stroke volume on echocardiography (mL)                                    | 66.1 (55.4-81.6)    | 65.9 (53.8-79.8)    | 68.4 (56.0-83.1)    | 0.23   |
| Stroke volume index on echocardiography (mL/m <sup>2</sup> )              | 32.9 (26.9-39.9)    | 32.4 (26.4-39.4)    | 33.4 (28.1-40.8)    | 0.036  |
| Cardiac output on echocardiography (L/min)                                | 4.4 (3.7-5.4)       | 4.4 (3.6-5.4)       | 4.4 (3.8-5.4)       | 0.41   |
| Cardiac index on echocardiography (L/min/m <sup>2</sup> )                 | 2.2 (1.8-2.6)       | 2.2 (1.8-2.6)       | 2.3 (1.9-2.7)       | 0.084  |
| Degree of mitral regurgitation                                            |                     |                     |                     | 0.22   |
| None                                                                      | 38 (7.2%)           | 23 (6.2%)           | 15 (9.6%)           |        |
| Trace                                                                     | 217 (41.0%)         | 145 (38.9%)         | 72 (46.2%)          |        |
| Mild                                                                      | 163 (30.8%)         | 119 (31.9%)         | 44 (28.2%)          |        |
| Mild-to-moderate                                                          | 63 (11.9%)          | 46 (12.3%)          | 17 (10.9%)          |        |
| Moderate                                                                  | 38 (7.2%)           | 31 (8.3%)           | 7 (4.5%)            |        |
| Moderate-to-severe                                                        | 7 (1.3%)            | 6 (1.6%)            | 1 (0.6%)            |        |
| Severe                                                                    | 3 (0.6%)            | 3 (0.8%)            | 0 (0.0%)            |        |
| Degree of tricuspid regurgitation                                         |                     |                     |                     | 0.14   |

|                                   |                  |                  |                  |        |
|-----------------------------------|------------------|------------------|------------------|--------|
| None                              | 15 (2.8%)        | 11 (3.0%)        | 4 (2.5%)         |        |
| Trace                             | 181 (34.3%)      | 118 (32.1%)      | 63 (39.6%)       |        |
| Mild                              | 201 (38.1%)      | 138 (37.5%)      | 63 (39.6%)       |        |
| Mild-to-moderate                  | 60 (11.4%)       | 44 (12.0%)       | 16 (10.1%)       |        |
| Moderate                          | 60 (11.4%)       | 49 (13.3%)       | 11 (6.9%)        |        |
| Moderate-to-severe                | 6 (1.1%)         | 6 (1.6%)         | 0 (0.0%)         |        |
| Severe                            | 4 (0.8%)         | 2 (0.5%)         | 2 (1.3%)         |        |
| Degree of aortic regurgitation    |                  |                  |                  | 0.94   |
| None                              | 313 (55.7%)      | 216 (54.7%)      | 97 (58.1%)       |        |
| Trace                             | 115 (20.5%)      | 81 (20.5%)       | 34 (20.4%)       |        |
| Mild                              | 95 (16.9%)       | 70 (17.7%)       | 25 (15.0%)       |        |
| Mild-to-moderate                  | 18 (3.2%)        | 13 (3.3%)        | 5 (3.0%)         |        |
| Moderate                          | 20 (3.6%)        | 14 (3.5%)        | 6 (3.6%)         |        |
| Moderate-to-severe                | 1 (0.2%)         | 1 (0.3%)         | 0 (0.0%)         |        |
| Degree of pulmonic regurgitation  |                  |                  |                  | 0.75   |
| None                              | 59 (14.4%)       | 44 (15.6%)       | 15 (11.7%)       |        |
| Trace                             | 216 (52.7%)      | 145 (51.4%)      | 71 (55.5%)       |        |
| Mild                              | 122 (29.8%)      | 83 (29.4%)       | 39 (30.5%)       |        |
| Mild-to-moderate                  | 12 (2.9%)        | 9 (3.2%)         | 3 (2.3%)         |        |
| Moderate                          | 1 (0.2%)         | 1 (0.4%)         | 0 (0.0%)         |        |
| LV global longitudinal strain (%) | 17.7 (15.4-20.2) | 17.3 (15.0-19.9) | 18.9 (16.8-20.8) | <0.001 |
| RV free wall strain (%)           | 22.4 (17.9-26.1) | 22.0 (17.6-25.6) | 23.1 (18.5-26.8) | 0.067  |
| LA reservoir strain (%)           | 20.3 (14.2-26.9) | 18.1 (13.0-25.3) | 24.5 (17.0-28.9) | <0.001 |
| RA reservoir strain (%)           | 24.0 (17.8-31.3) | 22.2 (17.1-29.1) | 27.1 (22.2-33.1) | <0.001 |
| Ratio of LA to RA strain          | 0.8 (0.6-1.1)    | 0.8 (0.6-1.1)    | 0.9 (0.6-1.1)    | 0.46   |

Data are presented as median (IQR) for continuous measures, and n (%) for categorical measures

**Supplemental Table 3. Baseline Clinical Factors Independently Associated With EILAH on Multivariable Logistic Regression**

| <b>Model</b>                     | <b>Variable</b>                                 | <b>Odds ratio</b> | <b>95% CI</b> | <b>P-value</b> |
|----------------------------------|-------------------------------------------------|-------------------|---------------|----------------|
| <b>1</b><br><br><b>(n = 548)</b> | Atrial fibrillation                             | 0.47              | 0.30-0.74     | <b>0.001</b>   |
|                                  | Loop diuretic                                   | 0.53              | 0.33-0.88     | <b>0.014</b>   |
|                                  | Systolic blood pressure (per 10 mm Hg increase) | 0.92              | 0.85-0.99     | <b>0.029</b>   |
|                                  | 6MWT distance (per 30-m increase)               | 1.09              | 1.03-1.17     | <b>0.004</b>   |
|                                  | Natriuretic peptide level (per 1-SD increase)   | 0.42              | 0.24-0.71     | <b>0.001</b>   |
| <b>2</b><br><br><b>(n = 451)</b> | Atrial fibrillation                             | 0.50              | 0.30-0.82     | <b>0.007</b>   |
|                                  | Systolic blood pressure (per 10 mm Hg increase) | 0.81              | 0.84-1.00     | <b>0.044</b>   |
|                                  | 6MWT distance (per 30-m increase)               | 1.09              | 1.01-1.17     | <b>0.018</b>   |
|                                  | Natriuretic peptide level (per 1-SD increase)   | 0.41              | 0.22-0.76     | <b>0.004</b>   |
|                                  | LV end-diastolic dimension (per 1 cm increase)  | 0.49              | 0.30-0.80     | <b>0.005</b>   |

**Model 1 covariates:** age, sex, atrial fibrillation, pacemaker, loop diuretic, beta-blocker, mineralocorticoid receptor antagonist, systolic blood pressure, 6MWT distance, natriuretic peptide level, and total bilirubin.

**Model 2 covariates:** all Model 1 covariates + LV end-diastolic dimension, LV mass, and E/e' ratio.

**Supplemental Table 4. Complete Invasive Resting and Exercise Hemodynamic Data**

|                                                       | <b>Total</b><br><b>N = 626</b> | <b>RELAH</b><br><b>n = 444</b> | <b>EILAH</b><br><b>n = 182</b> | <b>P-value</b> |
|-------------------------------------------------------|--------------------------------|--------------------------------|--------------------------------|----------------|
| Aortic systolic pressure at rest (mm Hg)              | 144.0 (129.0-159.0)            | 146.0 (132.0-160.0)            | 137.0 (125.0-153.0)            | <0.001         |
| Aortic diastolic pressure at rest (mm Hg)             | 75.0 (67.0-83.0)               | 74.0 (67.0-83.0)               | 75.0 (68.0-81.0)               | 0.44           |
| Aortic mean pressure at rest (mm Hg)                  | 98.0 (89.7-106.3)              | 99.5 (90.7-107.2)              | 95.0 (88.3-105.0)              | 0.008          |
| Aortic pulse pressure at rest (mm Hg)                 | 68.0 (54.0-81.0)               | 69.0 (56.0-82.0)               | 64.0 (51.0-76.0)               | 0.001          |
| Heart rate at rest (beats/min)                        | 70.0 (63.0-80.0)               | 70.0 (62.0-80.0)               | 70.0 (63.0-79.0)               | 0.82           |
| Right atrial pressure at rest (mm Hg)                 | 9.0 (7.0-12.0)                 | 10.0 (8.0-13.0)                | 6.0 (5.0-8.0)                  | <0.001         |
| PA systolic pressure at rest (mm Hg)                  | 40.0 (34.0-49.0)               | 44.0 (38.0-53.0)               | 32.0 (28.0-35.0)               | <0.001         |
| PA diastolic pressure at rest (mm Hg)                 | 19.0 (15.0-23.0)               | 21.0 (18.0-25.0)               | 14.5 (12.0-16.0)               | <0.001         |
| Mean PA pressure at rest (mm Hg)                      | 26.3 (21.3-32.0)               | 29.0 (24.7-33.7)               | 20.3 (17.7-22.7)               | <0.001         |
| PA pulse pressure at rest (mm Hg)                     | 21.0 (17.0-27.0)               | 23.0 (18.0-30.0)               | 18.0 (14.0-21.0)               | <0.001         |
| PCWP at rest (mm Hg)                                  | 18.0 (14.0-23.0)               | 21.0 (17.0-25.0)               | 12.0 (10.0-13.0)               | <0.001         |
| PCWP V wave at rest (mm Hg)                           | 23.0 (17.0-30.0)               | 27.0 (22.0-34.0)               | 15.0 (12.0-17.0)               | <0.001         |
| PCWP-right atrial pressure gradient at rest (mm Hg)   | 8.0 (5.0-12.0)                 | 11.0 (7.0-14.0)                | 5.0 (3.0-6.0)                  | <0.001         |
| Transpulmonary gradient at rest (mm Hg)               | 8.0 (6.0-11.0)                 | 8.0 (5.7-10.7)                 | 9.0 (6.7-11.0)                 | 0.016          |
| Diastolic pulmonary gradient at rest (mm Hg)          | 1.0 (-1.0-4.0)                 | 0.0 (-2.0-3.0)                 | 3.0 (1.0-5.0)                  | <0.001         |
| TAPSE/PA systolic pressure ratio at rest (mm/mm Hg)   | 0.5 (0.4-0.6)                  | 0.4 (0.3-0.6)                  | 0.6 (0.5-0.8)                  | <0.001         |
| Stroke volume at rest (mL)                            | 74.6 (62.6-89.3)               | 75.0 (62.5-89.2)               | 73.8 (64.0-89.7)               | 0.91           |
| Stroke volume index at rest (mL/m <sup>2</sup> )      | 36.8 (31.7-43.4)               | 36.6 (31.4-43.4)               | 37.3 (33.3-43.9)               | 0.15           |
| Cardiac output at rest (L/min)                        | 5.2 (4.4-6.2)                  | 5.2 (4.4-6.3)                  | 5.2 (4.4-6.2)                  | 0.99           |
| Cardiac index at rest (L/min/m <sup>2</sup> )         | 2.6 (2.2-3.0)                  | 2.5 (2.2-3.0)                  | 2.6 (2.2-3.1)                  | 0.26           |
| Systemic vascular resistance at rest (WU)             | 17.0 (13.7-20.9)               | 16.8 (13.6-20.9)               | 17.2 (14.0-20.7)               | 0.72           |
| SVR index at rest (WU × m <sup>2</sup> )              | 34.2 (28.4-41.2)               | 34.5 (28.1-41.1)               | 33.8 (28.8-41.4)               | 0.74           |
| Effective arterial elastance at rest (mm Hg/mL)       | 1.7 (1.4-2.1)                  | 1.7 (1.4-2.2)                  | 1.6 (1.4-2.0)                  | 0.11           |
| Pulse pressure/stroke volume ratio at rest (mm Hg/mL) | 0.9 (0.7-1.1)                  | 0.9 (0.7-1.1)                  | 0.8 (0.6-1.1)                  | 0.015          |
| Total pulmonary resistance at rest (WU)               | 4.9 (3.8-6.4)                  | 5.5 (4.4-6.8)                  | 3.7 (3.2-4.5)                  | <0.001         |
| Pulmonary vascular resistance at rest (WU)            | 1.5 (1.1-2.1)                  | 1.4 (1.0-2.1)                  | 1.7 (1.2-2.1)                  | 0.062          |
| PVR indexed to BSA at rest (WU × m <sup>2</sup> )     | 3.1 (2.2-4.2)                  | 2.9 (2.1-4.2)                  | 3.3 (2.5-4.3)                  | 0.10           |
| PVR indexed to height at rest (WU × m)                | 2.5 (1.8-3.5)                  | 2.4 (1.7-3.5)                  | 2.8 (2.0-3.5)                  | 0.053          |

|                                                              |                     |                     |                     |        |
|--------------------------------------------------------------|---------------------|---------------------|---------------------|--------|
| PA pulse pressure/stroke volume ratio at rest (mm Hg/mL)     | 0.3 (0.2-0.4)       | 0.3 (0.2-0.4)       | 0.2 (0.2-0.3)       | <0.001 |
| RV effective arterial elastance at rest (mm Hg/mL)           | 0.5 (0.4-0.7)       | 0.6 (0.5-0.8)       | 0.4 (0.4-0.5)       | <0.001 |
| PVR/SVR ratio at rest                                        | 0.1 (0.1-0.1)       | 0.1 (0.1-0.1)       | 0.1 (0.1-0.1)       | 0.068  |
| Right atrial pressure, legs up (mm Hg)                       | 11.0 (8.0-15.0)     | 12.0 (10.0-16.0)    | 8.5 (6.5-11.0)      | <0.001 |
| PA systolic pressure, legs up (mm Hg)                        | 47.0 (40.0-57.0)    | 52.0 (43.0-62.0)    | 39.0 (34.0-45.0)    | <0.001 |
| PA diastolic pressure, legs up (mm Hg)                       | 23.0 (19.0-28.0)    | 25.0 (21.0-29.0)    | 18.0 (15.0-20.0)    | <0.001 |
| Mean PA pressure, legs up (mm Hg)                            | 31.3 (26.0-37.3)    | 34.0 (29.3-39.7)    | 25.3 (21.7-28.3)    | <0.001 |
| PA pulse pressure, legs up (mm Hg)                           | 24.0 (19.0-32.0)    | 26.0 (20.0-34.0)    | 21.0 (18.0-26.0)    | <0.001 |
| PCWP, legs up (mm Hg)                                        | 22.0 (18.0-27.0)    | 25.0 (21.0-30.0)    | 17.0 (14.0-19.5)    | <0.001 |
| PCWP V wave, legs up (mm Hg)                                 | 29.0 (23.0-37.0)    | 33.0 (26.5-41.0)    | 22.0 (18.0-27.0)    | <0.001 |
| PCWP-right atrial pressure gradient, legs up (mm Hg)         | 11.0 (8.0-15.0)     | 12.0 (9.0-17.0)     | 8.0 (5.0-10.0)      | <0.001 |
| Transpulmonary gradient, legs up (mm Hg)                     | 8.7 (5.7-11.3)      | 8.7 (6.3-11.7)      | 8.0 (5.3-10.7)      | 0.040  |
| Diastolic pulmonary gradient, legs up (mm Hg)                | 0.0 (-3.0-3.0)      | 0.0 (-3.0-3.0)      | 1.0 (-2.0-4.0)      | 0.003  |
| Right atrial pressure at 20 W exercise (mm Hg)               | 17.0 (13.0-21.0)    | 18.0 (15.0-22.0)    | 14.0 (11.0-17.0)    | <0.001 |
| PA systolic pressure at 20 W exercise (mm Hg)                | 64.0 (54.0-75.0)    | 69.5 (58.0-79.0)    | 55.0 (48.0-63.0)    | <0.001 |
| PA diastolic pressure at 20 W exercise (mm Hg)               | 30.0 (27.0-37.0)    | 32.0 (29.0-39.0)    | 27.0 (23.0-30.0)    | <0.001 |
| Mean PA pressure at 20 W exercise (mm Hg)                    | 42.0 (36.0-48.7)    | 45.3 (38.7-51.3)    | 36.0 (32.0-41.0)    | <0.001 |
| PA pulse pressure at 20 W exercise (mm Hg)                   | 32.0 (25.0-41.5)    | 35.0 (28.0-44.0)    | 28.0 (21.0-35.0)    | <0.001 |
| PCWP at 20 W exercise (mm Hg)                                | 32.0 (27.0-38.0)    | 34.0 (29.0-40.0)    | 27.0 (24.0-31.0)    | <0.001 |
| PCWP V wave at 20 W exercise (mm Hg)                         | 45.0 (36.5-55.0)    | 48.0 (39.0-57.0)    | 38.0 (31.0-46.0)    | <0.001 |
| PCWP-right atrial pressure gradient at 20 W exercise (mm Hg) | 15.0 (11.0-19.0)    | 16.0 (12.0-21.0)    | 13.0 (10.0-17.0)    | <0.001 |
| Transpulmonary gradient at 20 W exercise (mm Hg)             | 9.7 (6.8-13.7)      | 10.0 (7.0-14.7)     | 9.0 (6.7-11.7)      | 0.018  |
| Diastolic pulmonary gradient at 20 W exercise (mm Hg)        | -1.0 (-4.0-2.0)     | -2.0 (-5.0-2.0)     | 0.0 (-3.0-2.0)      | 0.004  |
| Peak exercise capacity (W)                                   | 40.0 (20.0-60.0)    | 40.0 (20.0-60.0)    | 40.0 (40.0-60.0)    | <0.001 |
| Total duration of exercise (min)                             | 7.0 (5.0-10.5)      | 7.0 (5.0-10.0)      | 9.0 (6.0-11.0)      | <0.001 |
| Aortic systolic pressure at peak exercise (mm Hg)            | 160.0 (141.0-181.5) | 161.0 (142.0-182.0) | 158.0 (140.0-181.0) | 0.52   |
| Aortic diastolic pressure at peak exercise (mm Hg)           | 85.0 (73.0-96.0)    | 85.0 (72.0-97.0)    | 85.0 (73.0-94.0)    | 0.56   |
| Aortic mean pressure at peak exercise (mm Hg)                | 110.7 (98.0-122.7)  | 111.0 (98.7-124.0)  | 109.3 (96.7-120.7)  | 0.46   |
| Aortic pulse pressure at peak exercise (mm Hg)               | 74.0 (59.0-90.0)    | 74.0 (59.0-91.0)    | 75.0 (59.0-89.0)    | 0.90   |
| Peak heart rate (beats/min)                                  | 100.0 (86.0-113.0)  | 98.0 (85.0-112.0)   | 104.0 (92.0-114.0)  | 0.004  |
| Right atrial pressure at peak exercise (mm Hg)               | 18.0 (14.0-22.0)    | 19.0 (16.0-24.0)    | 15.0 (12.0-18.0)    | <0.001 |

|                                                                   |                   |                   |                  |        |
|-------------------------------------------------------------------|-------------------|-------------------|------------------|--------|
| PA systolic pressure at peak exercise (mm Hg)                     | 69.0 (60.0-80.0)  | 72.0 (62.0-81.0)  | 62.0 (56.0-69.0) | <0.001 |
| PA diastolic pressure at peak exercise (mm Hg)                    | 34.0 (29.0-40.0)  | 35.0 (30.0-40.0)  | 30.0 (27.0-35.0) | <0.001 |
| Mean PA pressure at peak exercise (mm Hg)                         | 45.3 (39.7-52.0)  | 47.5 (41.7-54.0)  | 41.0 (36.7-46.3) | <0.001 |
| PA pulse pressure at peak exercise (mm Hg)                        | 35.0 (28.0-43.0)  | 37.0 (29.5-46.0)  | 32.0 (26.0-38.0) | <0.001 |
| PCWP at peak exercise (mm Hg)                                     | 34.0 (29.0-40.0)  | 36.0 (32.0-42.0)  | 30.0 (27.0-35.0) | <0.001 |
| PCWP V wave at peak exercise (mm Hg)                              | 47.0 (38.0-56.0)  | 49.0 (41.0-59.0)  | 41.0 (34.5-50.0) | <0.001 |
| PCWP-right atrial pressure gradient at peak exercise (mm Hg)      | 16.0 (12.0-21.0)  | 17.0 (13.0-21.0)  | 15.5 (11.0-19.0) | 0.005  |
| Transpulmonary gradient at peak exercise (mm Hg)                  | 10.7 (7.0-15.3)   | 11.0 (7.3-15.7)   | 10.0 (6.7-14.3)  | 0.16   |
| Diastolic pulmonary gradient at peak exercise (mm Hg)             | -1.0 (-4.0-3.0)   | -1.0 (-5.0-3.0)   | 0.0 (-3.0-3.0)   | 0.097  |
| Stroke volume at peak exercise (mL)                               | 52.8 (43.5-65.3)  | 53.5 (44.4-67.6)  | 51.6 (41.1-62.4) | 0.083  |
| Stroke volume index at peak exercise (mL/m <sup>2</sup> )         | 26.6 (22.0-31.5)  | 26.6 (22.1-31.7)  | 26.3 (21.5-30.7) | 0.38   |
| Cardiac output at peak exercise (L/min)                           | 8.0 (6.4-10.1)    | 7.9 (6.1-9.7)     | 8.8 (7.0-11.1)   | <0.001 |
| Cardiac index at peak exercise (L/min/m <sup>2</sup> )            | 3.9 (3.2-4.8)     | 3.8 (3.1-4.6)     | 4.4 (3.6-5.2)    | <0.001 |
| Systemic vascular resistance at peak exercise (WU)                | 11.5 (9.0-15.0)   | 12.0 (9.1-15.4)   | 10.7 (8.2-14.6)  | 0.010  |
| SVR index at peak exercise (WU × m <sup>2</sup> )                 | 23.8 (18.3-30.1)  | 24.3 (19.3-31.2)  | 21.7 (17.0-27.3) | 0.001  |
| Effective arterial elastance at peak exercise (mm Hg/mL)          | 2.7 (2.1-3.5)     | 2.6 (2.0-3.4)     | 2.8 (2.2-3.5)    | 0.34   |
| Pulse pressure/stroke volume ratio at peak exercise (mm Hg/mL)    | 1.4 (1.0-1.8)     | 1.3 (1.0-1.8)     | 1.4 (1.0-1.9)    | 0.35   |
| Total pulmonary resistance at peak exercise (WU)                  | 5.6 (4.4-7.3)     | 6.1 (4.7-7.9)     | 4.7 (3.8-6.1)    | <0.001 |
| Pulmonary vascular resistance at peak exercise (WU)               | 1.3 (0.8-2.0)     | 1.4 (0.9-2.1)     | 1.1 (0.8-1.7)    | 0.001  |
| PVR indexed to BSA at peak exercise (WU × m <sup>2</sup> )        | 4.2 (2.7-6.0)     | 4.3 (2.7-6.2)     | 3.9 (2.7-5.5)    | 0.100  |
| PVR indexed to height at peak exercise (WU × m)                   | 2.2 (1.4-3.3)     | 2.4 (1.5-3.5)     | 2.0 (1.2-2.8)    | 0.001  |
| PA pulse pressure/stroke volume ratio at peak exercise (mm Hg/mL) | 0.6 (0.5-0.9)     | 0.7 (0.5-0.9)     | 0.6 (0.5-0.8)    | 0.014  |
| RV effective arterial elastance at peak exercise (mm Hg/mL)       | 1.3 (1.0-1.6)     | 1.3 (1.0-1.7)     | 1.2 (1.0-1.5)    | 0.005  |
| PVR/SVR ratio at peak exercise                                    | 0.1 (0.1-0.2)     | 0.1 (0.1-0.2)     | 0.1 (0.1-0.2)    | 0.34   |
| Workload-corrected PCWP (mm Hg/W/kg)                              | 76.6 (51.8-123.9) | 86.0 (58.6-145.7) | 57.8 (40.6-90.0) | <0.001 |
| PCWP/CO slope (mm Hg/L/min)                                       | 5.9 (3.6-10.5)    | 6.2 (3.6-11.0)    | 5.4 (3.6-9.7)    | 0.31   |
| Delta PCWP, rest to peak exercise (mm Hg)                         | 16.0 (12.0-21.0)  | 15.0 (10.0-20.0)  | 19.0 (15.0-23.5) | <0.001 |
| Delta CO, rest to peak exercise (L/min)                           | 2.7 (1.6-4.2)     | 2.4 (1.5-3.9)     | 3.5 (2.2-4.8)    | <0.001 |

Data are presented as median (IQR).



**Supplemental Table 5. Effects of Atrial Shunt on Echocardiographic Variables, Baseline to 12 Months**

| <b>Change in Cardiac Structure at 12 months</b>    | <b>Shunt</b>             | <b>Sham</b>              | <b>P-value</b>    |
|----------------------------------------------------|--------------------------|--------------------------|-------------------|
| <b><i>EILAH</i></b>                                |                          |                          |                   |
| <b>Right atrial volume index, mL/m<sup>2</sup></b> | +8.8 (+4.7, +13.0)       | +1.6 (-1.5, +4.6)        | <b>0.006</b>      |
| <b>RV diastolic volume index, mL/m<sup>2</sup></b> | +7.4 (+2.3, +12.5)       | +1.6 (-1.7, +5.0)        | <b>0.07</b>       |
| TAPSE, cm                                          | +0.10 (+0.01, +0.20)     | +0.08 (-0.02, +0.18)     | 0.74              |
| Tricuspid regurgitation severity (0-4)             | +0.10 (-0.05, +0.25)     | -0.07 (-0.17, +0.04)     | 0.08              |
| Tricuspid regurgitation velocity (cm/s)            | -6.7 (-20.3, +6.9)       | 0.7 (-8.0, +9.5)         | 0.36              |
| LA volume index, mL/m <sup>2</sup>                 | +1.5 (-3.3, +6.4)        | +0.6 (-3.0, +4.1)        | 0.74              |
| LV end diastolic volume index, mL/m <sup>2</sup>   | -2.2 (-6.2, +1.9)        | -2.7 (-7.5, +2.2)        | 0.87              |
| LV ejection fraction, %                            | -0.2 (-1.3, +0.9)        | +0.8 (-0.3, +1.8)        | 0.19              |
| E/e' ratio                                         | -0.9 (-1.9, +0.2)        | +0.1 (-0.7, +0.9)        | 0.14              |
| <b><i>RELAH</i></b>                                |                          |                          |                   |
| <b>Right atrial volume index, mL/m<sup>2</sup></b> | +9.5 (+6.5, +12.5)       | -0.6 (-3.2, +1.9)        | <b>&lt;0.0001</b> |
| <b>RV diastolic volume index, mL/m<sup>2</sup></b> | +8.9 (+5.2, +12.6)       | -0.9 (-3.9, +2.1)        | <b>0.0001</b>     |
| TAPSE, cm                                          | 0.01 (-0.05, +0.07)      | -0.01 (-0.07, +0.04)     | 0.58              |
| <b>Tricuspid regurgitation severity (0-4)</b>      | +0.18 (+0.07, +0.29)     | -0.00 (-0.08, +0.08)     | <b>0.009</b>      |
| Tricuspid regurgitation velocity (cm/s)            | +4.3 (-3.9, +12.4)       | -0.8 (-8.6, +7.0)        | 0.37              |
| LA volume index, mL/m <sup>2</sup>                 | -1.0 (-3.3, +1.3)        | -0.7 (-3.0, +1.5)        | 0.86              |
| LV end diastolic volume index, mL/m <sup>2</sup>   | -7.4 (-10.2, -4.6)       | -4.7 (-8.0, -1.3)        | 0.21              |
| <b>LV ejection fraction, %</b>                     | <b>-0.7 (-1.7, +0.2)</b> | <b>+0.6 (-0.2, +1.4)</b> | <b>0.04</b>       |
| <b>E/e' ratio</b>                                  | <b>-1.0 (-1.9, -0.2)</b> | <b>+0.2 (-0.7, +1.2)</b> | <b>0.05</b>       |

Values represent mean change (95% CI).

TAPSE (tricuspid annular plane systolic excursion); LA (left atrial); LV (left ventricular).

**Supplemental Table 6A. Stratified Safety Outcomes in Patients With EILAH**

|                                                                              | <b>Total<br/>N = 180</b> | <b>Sham<br/>procedure<br/>n = 88</b> | <b>Atrial shunt<br/>device<br/>n = 92</b> | <b>P-<br/>value</b> |
|------------------------------------------------------------------------------|--------------------------|--------------------------------------|-------------------------------------------|---------------------|
| Cardiovascular mortality within 365 days                                     | 1 (0.6%)                 | 1 (1.1%)                             | 0 (0.0%)                                  | 0.31                |
| Non-fatal ischemic stroke within 365 days                                    | 0 (0.0%)                 | 0 (0.0%)                             | 0 (0.0%)                                  |                     |
| New onset or worsening of kidney dysfunction within 365 days                 | 8 (4.5%)                 | 4 (4.6%)                             | 4 (4.4%)                                  | 0.96                |
| Any MACE within 365 days                                                     | 3 (1.7%)                 | 1 (1.1%)                             | 2 (2.2%)                                  | 0.58                |
| Cardiac death within 365 days                                                | 1 (0.6%)                 | 1 (1.1%)                             | 0 (0.0%)                                  | 0.31                |
| Cardiac tamponade within 365 days                                            | 1 (0.6%)                 | 0 (0.0%)                             | 1 (1.1%)                                  | 0.32                |
| Emergency cardiac surgery within 365 days                                    | 0 (0.0%)                 | 0 (0.0%)                             | 0 (0.0%)                                  |                     |
| Thrombo-embolic complications within 365 days                                | 0 (0.0%)                 | 0 (0.0%)                             | 0 (0.0%)                                  |                     |
| TIA within 365 days                                                          | 0 (0.0%)                 | 0 (0.0%)                             | 0 (0.0%)                                  |                     |
| Systemic embolic events within 365 days                                      | 0 (0.0%)                 | 0 (0.0%)                             | 0 (0.0%)                                  |                     |
| Newly acquired persistent or permanent atrial fibrillation or atrial flutter | 1 (0.6%)                 | 0 (0.0%)                             | 1 (1.1%)                                  | 0.32                |
| ≥30% Increase in RV size within 365 days                                     | 49<br>(27.7%)            | 17 (19.5%)                           | 32 (35.6%)                                | 0.017               |
| ≥30% Decrease in TAPSE within 365 days                                       | 7 (4.0%)                 | 5 (5.7%)                             | 2 (2.2%)                                  | 0.23                |
| ≥30% Increase in RV size/decrease in TAPSE within 365 days                   | 55<br>(31.1%)            | 22 (25.3%)                           | 33 (36.7%)                                | 0.10                |

Data are presented as n (%).

**Supplemental Table 6B. Safety Outcomes in Patients With RELAH**

|                                                                              | <b>Total</b><br><b>N = 441</b> | <b>Sham</b><br><b>procedure</b><br><b>n = 224</b> | <b>Atrial shunt</b><br><b>device</b><br><b>n = 217</b> | <b>P-</b><br><b>value</b> |
|------------------------------------------------------------------------------|--------------------------------|---------------------------------------------------|--------------------------------------------------------|---------------------------|
| Cardiovascular mortality within 365 days                                     | 3 (0.7%)                       | 1 (0.5%)                                          | 2 (0.9%)                                               | 0.55                      |
| Non-fatal ischemic stroke within 365 days                                    | 1 (0.2%)                       | 0 (0.0%)                                          | 1 (0.5%)                                               | 0.31                      |
| New onset or worsening of kidney dysfunction within 365 days                 | 39 (8.9%)                      | 21 (9.5%)                                         | 18 (8.3%)                                              | 0.66                      |
| Any MACE within 365 days                                                     | 9 (2.1%)                       | 1 (0.5%)                                          | 8 (3.7%)                                               | 0.017                     |
| Cardiac death within 365 days                                                | 3 (0.7%)                       | 1 (0.5%)                                          | 2 (0.9%)                                               | 0.55                      |
| Cardiac tamponade within 365 days                                            | 1 (0.2%)                       | 0 (0.0%)                                          | 1 (0.5%)                                               | 0.31                      |
| Emergency cardiac surgery within 365 days                                    | 1 (0.2%)                       | 0 (0.0%)                                          | 1 (0.5%)                                               | 0.31                      |
| Thrombo-embolic complications within 365 days                                | 0 (0.0%)                       | 0 (0.0%)                                          | 0 (0.0%)                                               |                           |
| TIA within 365 days                                                          | 0 (0.0%)                       | 0 (0.0%)                                          | 0 (0.0%)                                               |                           |
| Systemic embolic events within 365 days                                      | 0 (0.0%)                       | 0 (0.0%)                                          | 0 (0.0%)                                               |                           |
| Newly acquired persistent or permanent atrial fibrillation or atrial flutter | 5 (1.1%)                       | 2 (0.9%)                                          | 3 (1.4%)                                               | 0.64                      |
| ≥30% Increase in RV size within 365 days                                     | 103<br>(23.5%)                 | 46 (20.8%)                                        | 57 (26.3%)                                             | 0.18                      |
| ≥30% Decrease in TAPSE within 365 days                                       | 12 (2.7%)                      | 10 (4.5%)                                         | 2 (0.9%)                                               | 0.021                     |
| ≥30% Increase in RV size/decrease in TAPSE within 365 days                   | 113<br>(25.8%)                 | 54 (24.4%)                                        | 59 (27.2%)                                             | 0.51                      |

Data are presented as n (%).

**Supplemental Figure 1.** Changes in New York Heart Association functional class with atrial shunt therapy or sham treatment in the groups with resting PCWP < 15 mm Hg (exercise-induced LA hypertension; EILAH) and those with resting PCWP  $\geq$  15 mm Hg (resting LA hypertension; RELAH). There was significant improvement in New York Heart Association functional class in the group with EILAH after atrial shunt therapy, but not in the group with RELAH.

Supplemental Figure 1

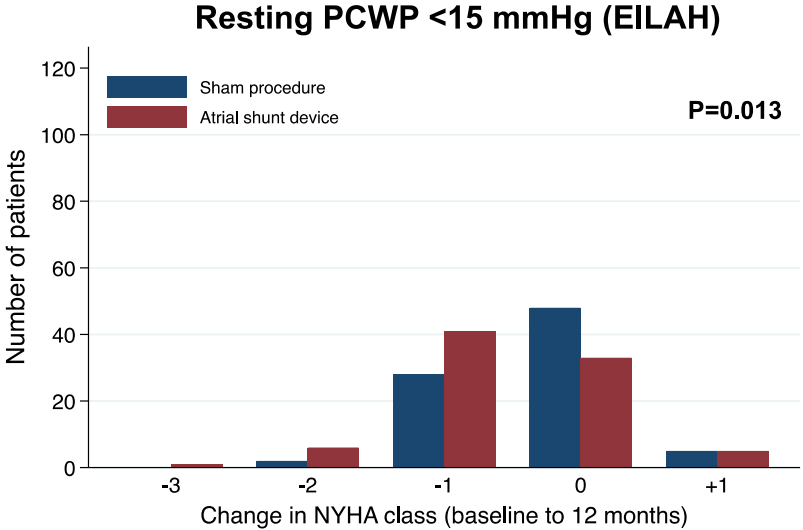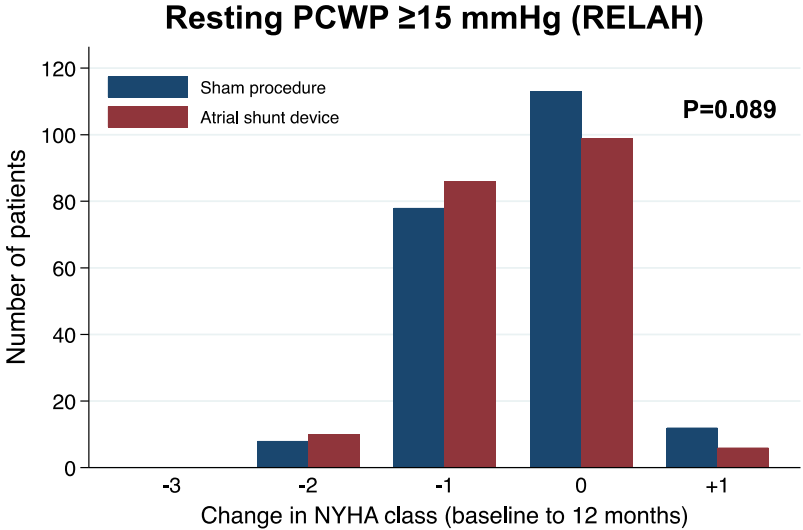

Supplement: NIHMS1980731-supplement-Supplement_ELIAH_paper.pdf [file NIHMS1980731-supplement-Supplement_ELIAH_paper.pdf]
